# Supplementary material for: Study on the synthesis and thermal stability of silicone resins reinforced by Si–O–Ph cross-linking
Source: Royal Society of Chemistry journal article supplement (doi:10.1039/d1ra05524k), 2021-01-01
Supplement: d1ra05524k1.pdf [file d1ra05524k1.pdf]

## **Study on the Synthesis and Thermal Stability of Silicone Resins**

### **Reinforced by Si-O-Ph Cross-linking**

Huadong Zhang<sup>a</sup>, Zhongyi Yan<sup>a</sup>, Zhizhou Yang<sup>a\*</sup>, Jinshui Yao<sup>a</sup>, Qihong Mu<sup>b</sup>, Dan Peng<sup>b</sup>, Hui Zhao<sup>a, c</sup>

<sup>a</sup> School of Materials Science and Engineering, Qilu University of Technology (Shandong Academy of Sciences), Jinan 250353, China

<sup>b</sup> Shandong Provincial Key Laboratory of Special Silicone-Containing Materials, Advanced Materials Institute, Qilu University of Technology (Shandong Academy of Sciences), Jinan 250014, China

<sup>c</sup> School of Chemical Engineering, Sichuan University, Chengdu 610065, China

\* Corresponding author.

mail address: [yzz@qlu.edu.cn](mailto:yzz@qlu.edu.cn)

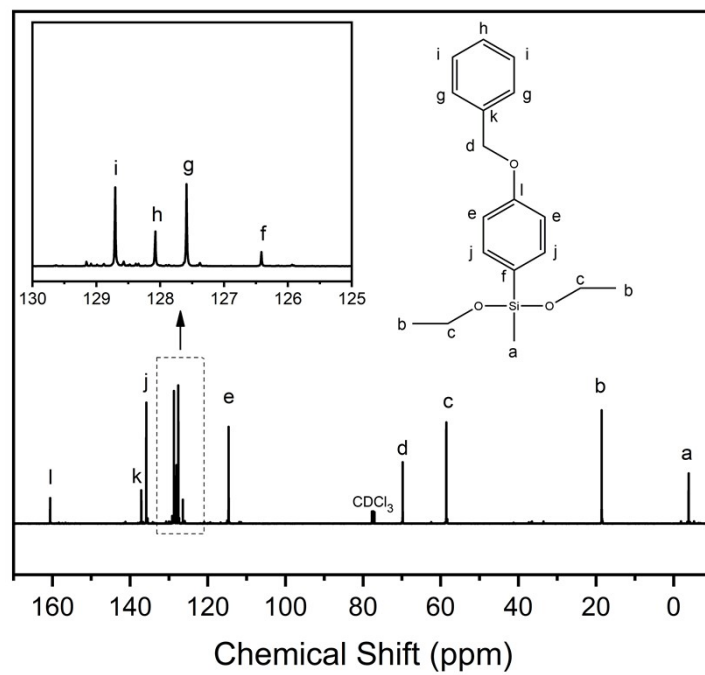

**Fig. S1**  $^{13}\text{C}$ -NMR spectrum of SBn

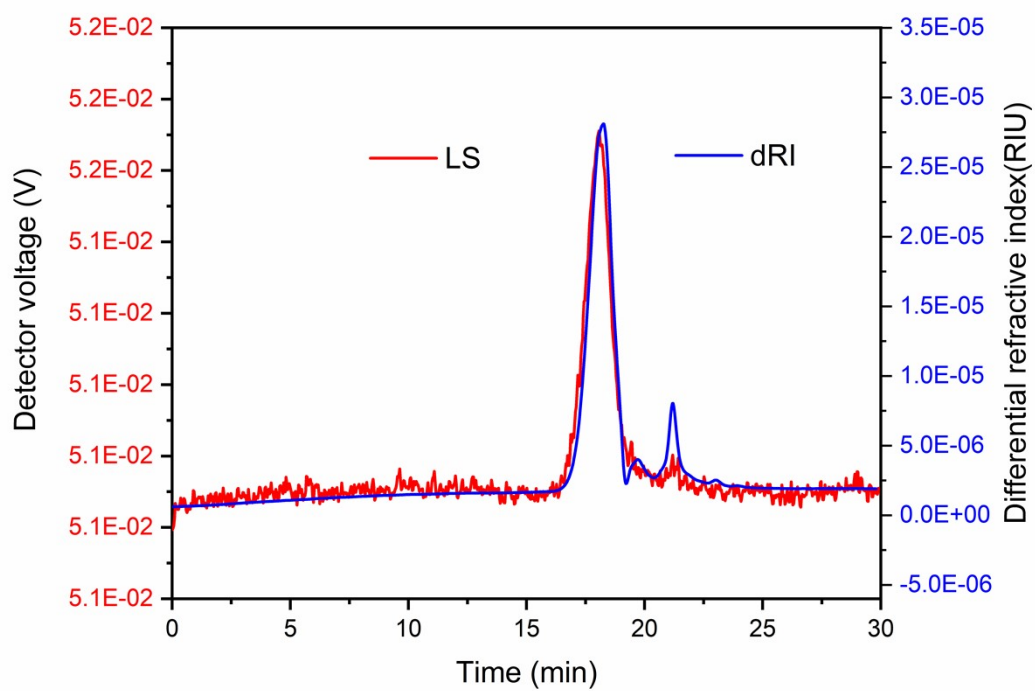

**Fig. S2** The GPC curves of SR-Bn under LS and dRI detection signals
